# Supplementary material
Source: ML conference proceedings conference paper supplement (https://proceedings.mlr.press/v130/song21a.html)
Supplement: Supplementary file 1 [file song21a-supp.zip]

Archive with 2 entries (2 files):
- full_version.pdf
- __MACOSX/._full_version.pdf
